# Supplementary material for: Study of supercooled orientationally disordered binary solid solutions II: cyclohexyl derivatives, neopentanol and neopentylglycol
Source: Royal Society of Chemistry journal article supplement (doi:10.1039/b907215b), 2009-01-01
Supplement: b907215b.pdf [file b907215b.pdf]

**SIT<sub>1</sub>: Details of the parameters of Eq. 2 for various relaxation processes shown in SIF<sub>2</sub> (in CHXOL + CHPOL,  $x_m = 0.25$ ).**

| Processes          | Temp (K) | $\alpha_{HN}$ | $\beta_{HN}$ | $f_0$ (Hz)            | $f_m$ (Hz)            | $\Delta\epsilon$ |
|--------------------|----------|---------------|--------------|-----------------------|-----------------------|------------------|
| $\alpha$ - process | 152.8    | 0.066         | 0.733        | $1.28 \times 10^{-2}$ | $1.68 \times 10^{-2}$ | 19.71            |
|                    | 165.1    | 0.047         | 0.689        | $1.77 \times 10^0$    | $2.42 \times 10^0$    | 19.85            |
|                    | 180.8    | 0.074         | 0.718        | $1.02 \times 10^2$    | $1.39 \times 10^2$    | 20.23            |
|                    | 199.9    | 0.032         | 0.711        | $2.27 \times 10^3$    | $3.02 \times 10^3$    | 19.21            |
|                    | 224.8    | 0.021         | 0.737        | $4.93 \times 10^4$    | $6.31 \times 10^4$    | 18.35            |
|                    | 240.2    | 0.008         | 0.714        | $2.21 \times 10^5$    | $2.89 \times 10^5$    | 18.03            |
|                    | 260.5    | 0.000         | 0.714        | $1.33 \times 10^6$    | $1.73 \times 10^6$    | 17.19            |
| $\beta$ - process  | 152.8    | 0.555         | 1.00         | $3.31 \times 10^1$    | $3.31 \times 10^1$    | 0.582            |
|                    | 158.4    | 0.507         | 1.00         | $9.55 \times 10^1$    | $9.55 \times 10^1$    | 0.501            |
| $\gamma$ - process | 100.7    | 0.840         | 1.00         | $1.39 \times 10^1$    | $1.39 \times 10^1$    | 0.2499           |
|                    | 105.9    | 0.828         | 1.00         | $1.27 \times 10^2$    | $1.27 \times 10^2$    | 0.2510           |
|                    | 110.6    | 0.817         | 1.00         | $5.68 \times 10^2$    | $5.68 \times 10^2$    | 0.2562           |
|                    | 115.0    | 0.797         | 1.00         | $2.65 \times 10^3$    | $2.65 \times 10^3$    | 0.2516           |
|                    | 120.3    | 0.764         | 1.00         | $1.59 \times 10^4$    | $1.59 \times 10^4$    | 0.2342           |
|                    | 125.2    | 0.752         | 1.00         | $5.18 \times 10^4$    | $5.18 \times 10^4$    | 0.2434           |
|                    | 130.5    | 0.728         | 1.00         | $1.35 \times 10^5$    | $1.35 \times 10^5$    | 0.2977           |

**SIT<sub>2</sub>: Details of the parameters of Eq. 2 for the fits shown in SIF<sub>6</sub> (in NPOL + NPGOL,  $x_m = 0.13$ ).**

| Processes          | Temp (K) | $\alpha_{HN}$ | $\beta_{HN}$ | $f_0$ (Hz)            | $f_m$ (Hz)            | $\Delta\epsilon$ |
|--------------------|----------|---------------|--------------|-----------------------|-----------------------|------------------|
| $\alpha$ - process | 156.5    | 0.152         | 0.830        | $4.81 \times 10^{-2}$ | $5.80 \times 10^{-1}$ | 6.32             |
|                    | 168.8    | 0.163         | 0.855        | $2.50 \times 10^2$    | $2.92 \times 10^0$    | 8.33             |
|                    | 187.7    | 0.132         | 0.799        | $9.10 \times 10^1$    | $1.12 \times 10^2$    | 10.47            |
|                    | 200.4    | 0.104         | 0.783        | $3.18 \times 10^3$    | $3.99 \times 10^3$    | 10.50            |
|                    | 224.9    | 0.049         | 0.714        | $9.38 \times 10^4$    | $1.24 \times 10^5$    | 10.05            |
|                    | 235.4    | 0.021         | 0.604        | $2.92 \times 10^5$    | $4.39 \times 10^5$    | 10.27            |
| $\beta$ - process  | 156.5    | 0.631         | 1.00         | $2.65 \times 10^1$    | $2.65 \times 10^1$    | 0.220            |
| $\gamma$ - process | 105.4    | 0.658         | 1.00         | $1.59 \times 10^4$    | $1.59 \times 10^4$    | 0.102            |
|                    | 110.5    | 0.621         | 1.00         | $5.20 \times 10^4$    | $5.19 \times 10^4$    | 0.101            |
|                    | 115.9    | 0.586         | 1.00         | $1.54 \times 10^5$    | $1.54 \times 10^5$    | 0.099            |
|                    | 120.2    | 0.563         | 1.00         | $3.19 \times 10^5$    | $3.18 \times 10^5$    | 0.099            |
|                    | 125.8    | 0.577         | 1.00         | $1.41 \times 10^6$    | $1.40 \times 10^6$    | 0.116            |

SIT<sub>3</sub>. Details of parameters of Eq. 2 for the fits shown in SIF<sub>7</sub> (in CNCH + CHC, X<sub>m</sub> = 0.125).

| Process   | Temp (K) | $\alpha_{HN}$ | $\beta_{HN}$ | $f_0$ (Hz)            | $f_m$ (Hz)            | $\Delta\epsilon$ |
|-----------|----------|---------------|--------------|-----------------------|-----------------------|------------------|
| $\alpha'$ | 185.6    | 0.406         | 0.943        | $5.55 \times 10^1$    | $6.07 \times 10^1$    | 1.565            |
|           | 190.1    | 0.405         | 1.000        | $1.99 \times 10^2$    | $1.99 \times 10^2$    | 1.498            |
|           | 195.2    | 0.355         | 1.000        | $5.90 \times 10^2$    | $5.90 \times 10^2$    | 1.355            |
|           | 200.8    | 0.322         | 1.000        | $1.77 \times 10^3$    | $1.77 \times 10^3$    | 1.239            |
| $\alpha$  | 135.4    | 0.180         | 0.657        | $2.25 \times 10^{-2}$ | $3.49 \times 10^{-2}$ | 11.03            |
|           | 150.5    | 0.140         | 0.586        | $2.76 \times 10^1$    | $4.66 \times 10^1$    | 11.51            |
|           | 165.4    | 0.146         | 0.599        | $3.98 \times 10^3$    | $6.62 \times 10^3$    | 11.96            |
|           | 185.6    | 0.045         | 0.388        | $1.75 \times 10^5$    | $3.92 \times 10^5$    | 12.56            |
|           | 195.2    | 0.011         | 0.299        | $5.54 \times 10^5$    | $1.49 \times 10^6$    | 13.82            |
| $\beta$   | 100.8    | 0.505         | 0.232        | $1.93 \times 10^1$    | $3.24 \times 10^2$    | 0.284            |
|           | 105.5    | 0.634         | 0.350        | $5.17 \times 10^1$    | $8.48 \times 10^2$    | 0.336            |
|           | 110.1    | 0.680         | 0.421        | $2.31 \times 10^2$    | $3.26 \times 10^3$    | 0.389            |
|           | 115.1    | 0.705         | 0.501        | $1.14 \times 10^3$    | $1.14 \times 10^4$    | 0.422            |
|           | 120.4    | 0.735         | 0.738        | $1.59 \times 10^4$    | $4.99 \times 10^4$    | 0.440            |
|           | 125.0    | 0.759         | 1.000        | $1.67 \times 10^5$    | $1.67 \times 10^5$    | 0.481            |

SIF<sub>1</sub>

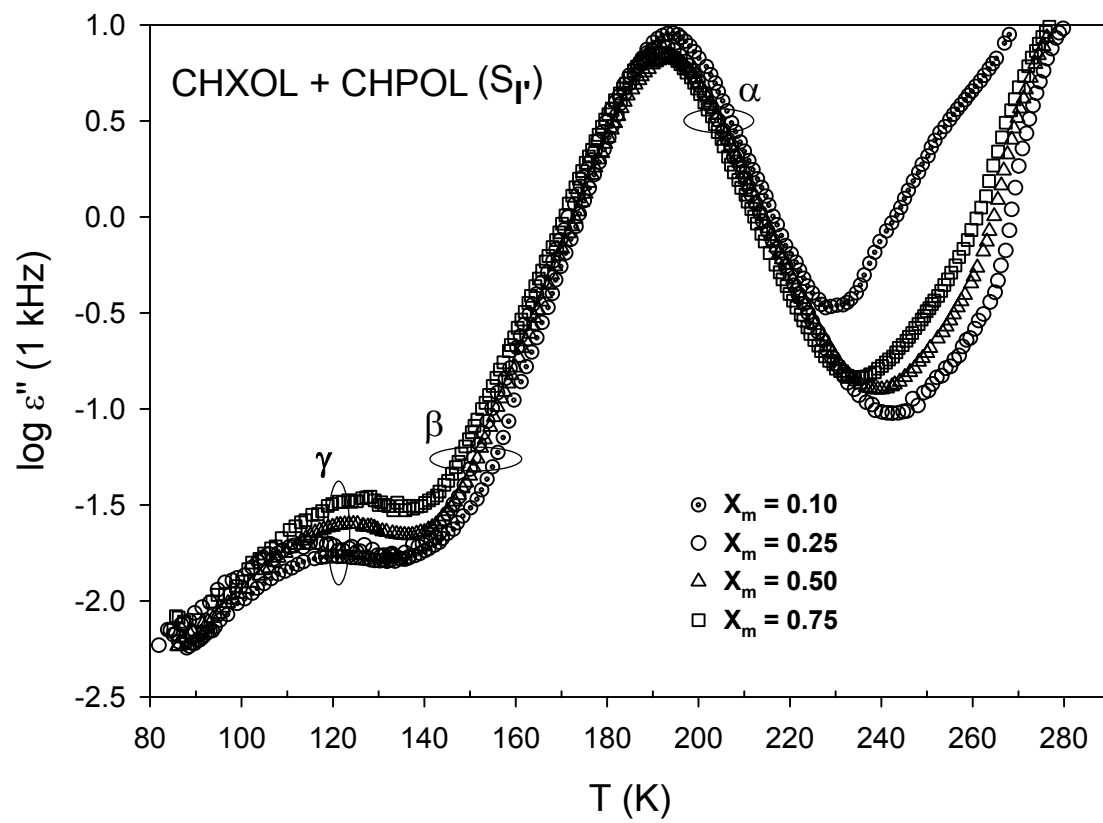

SIF<sub>2</sub>

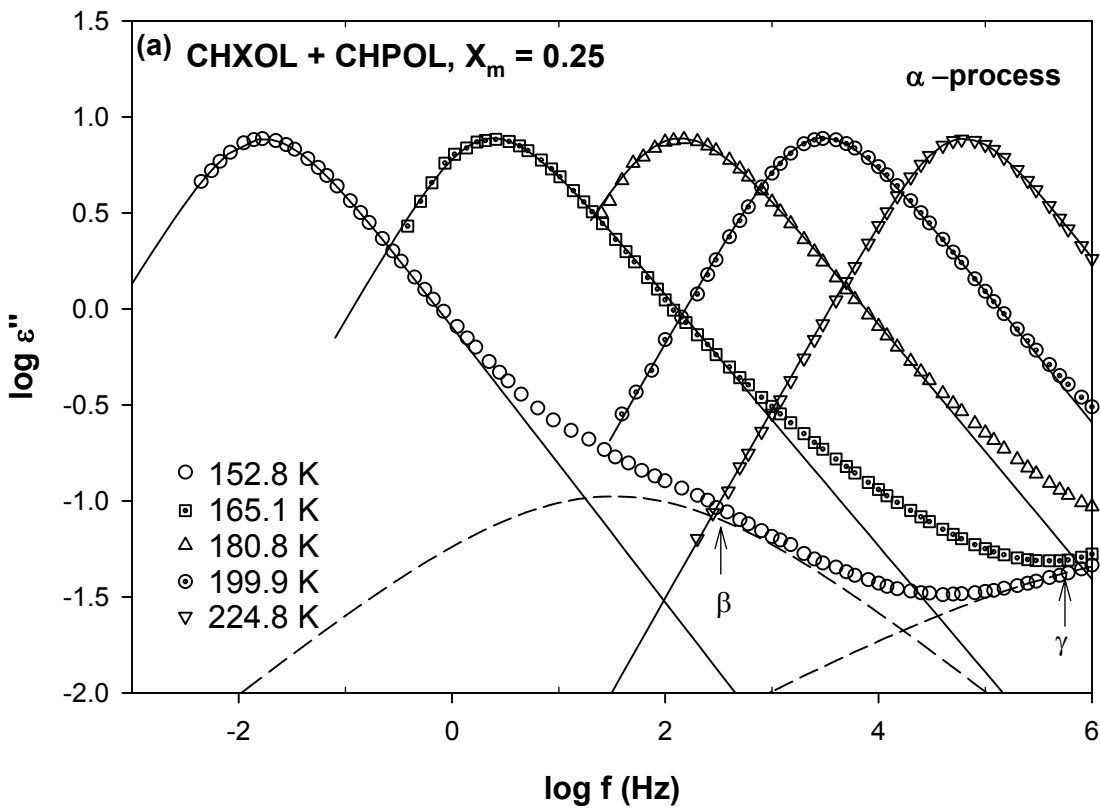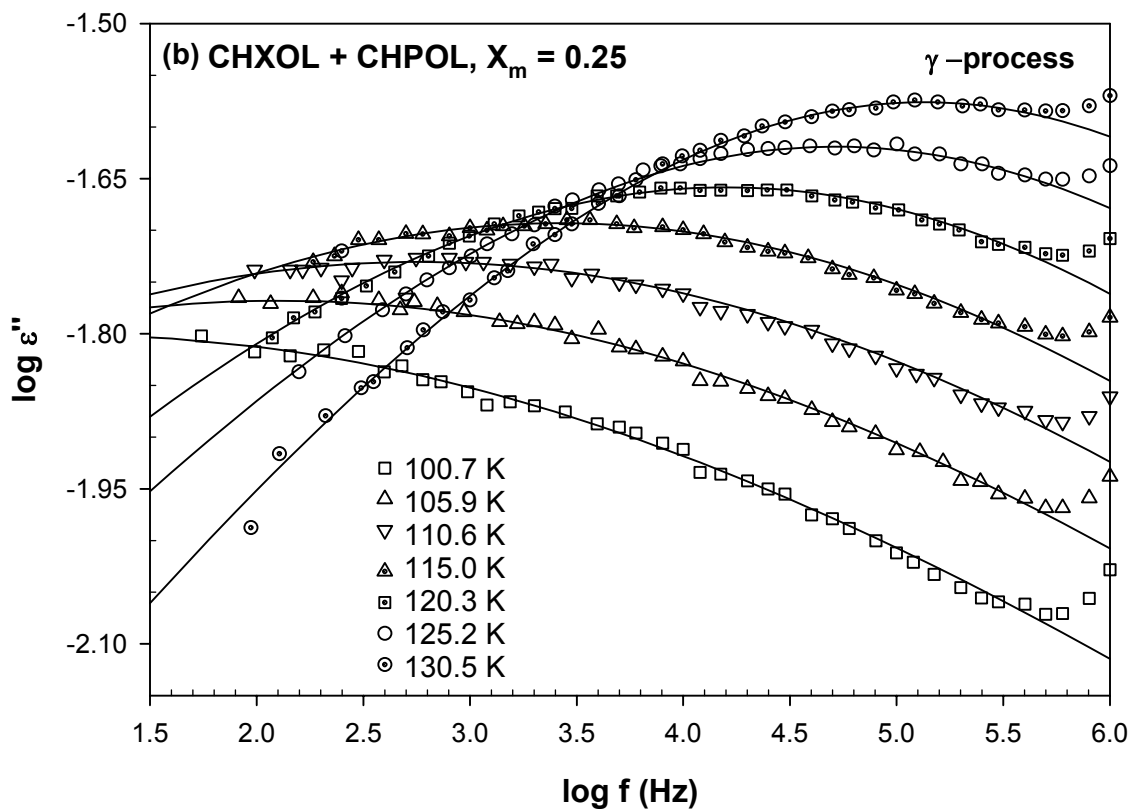

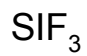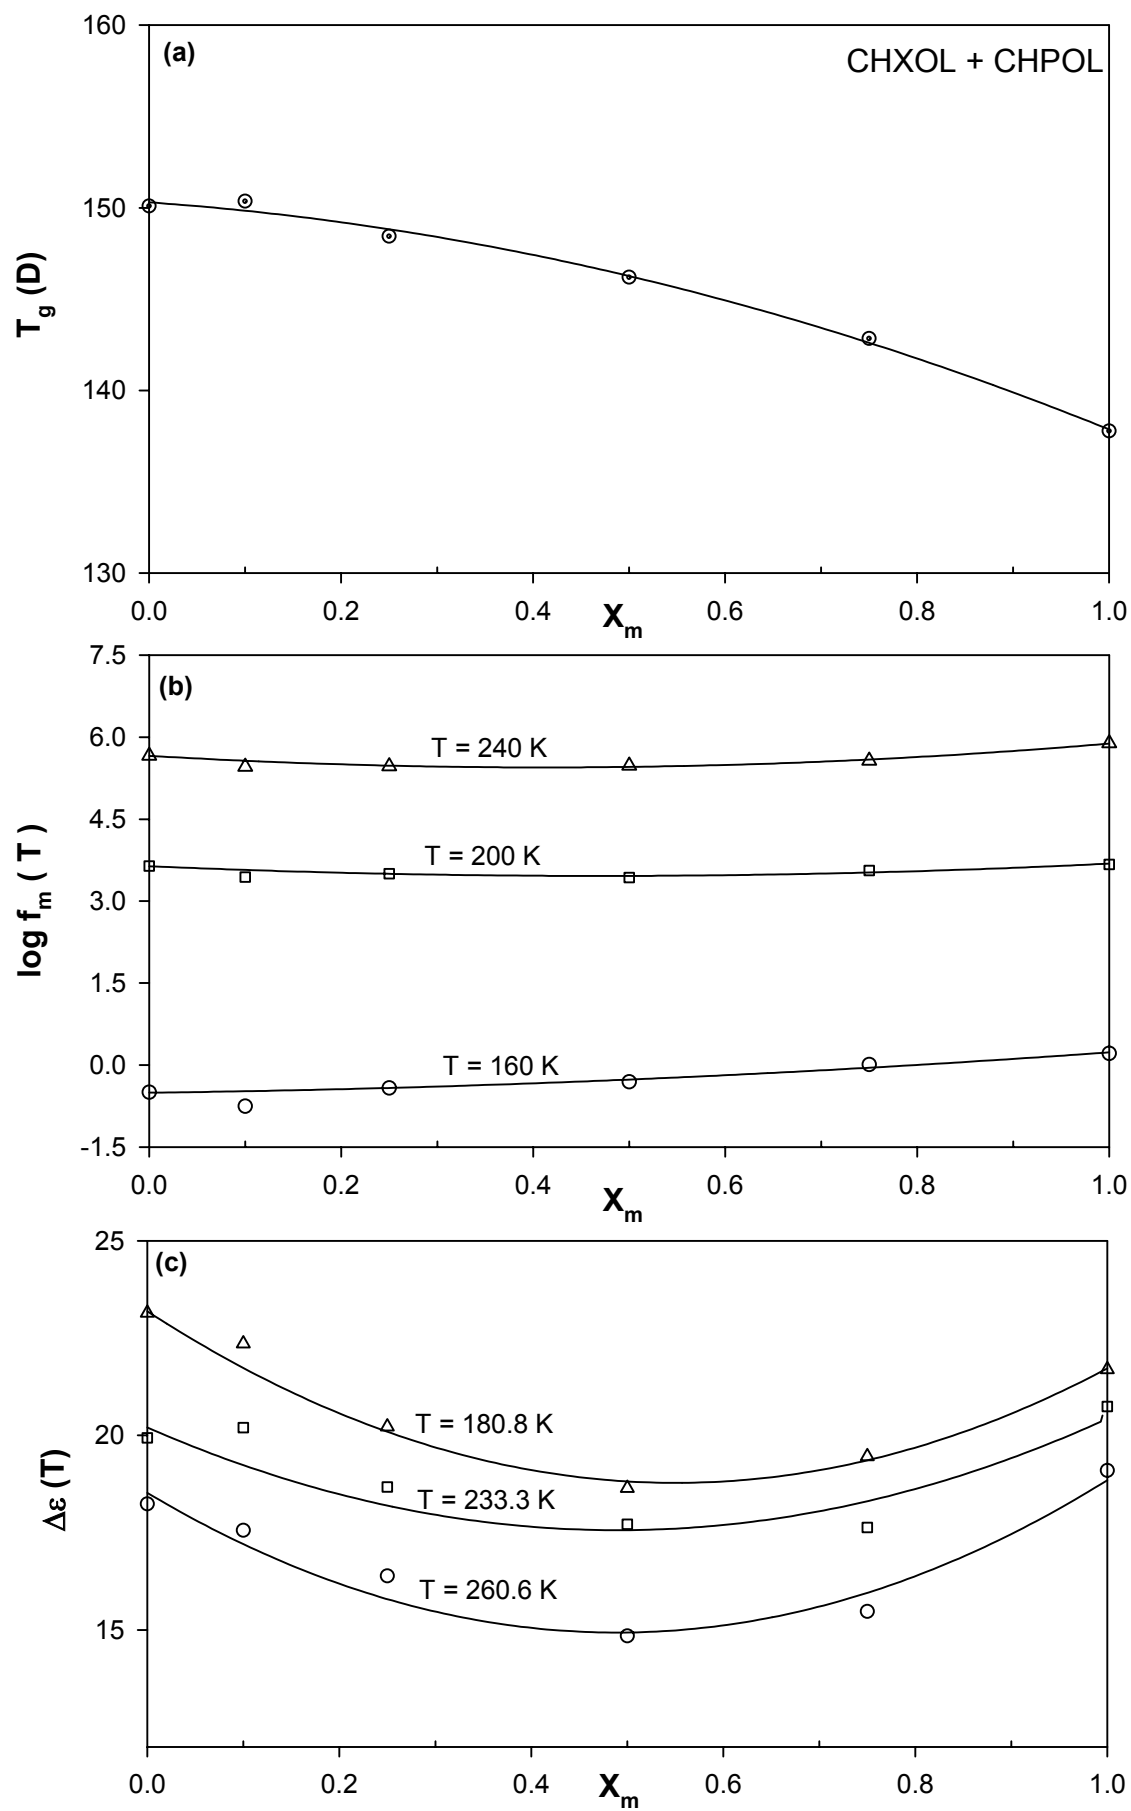

SIF<sub>4</sub>

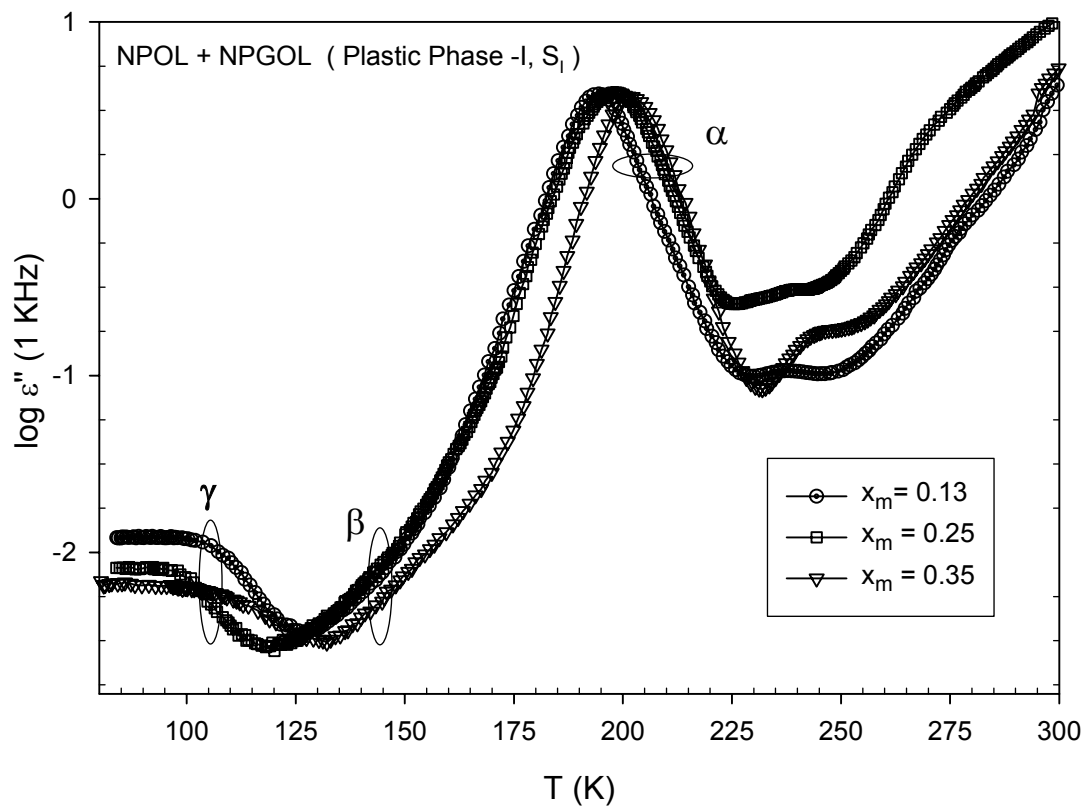

SIF<sub>5</sub>

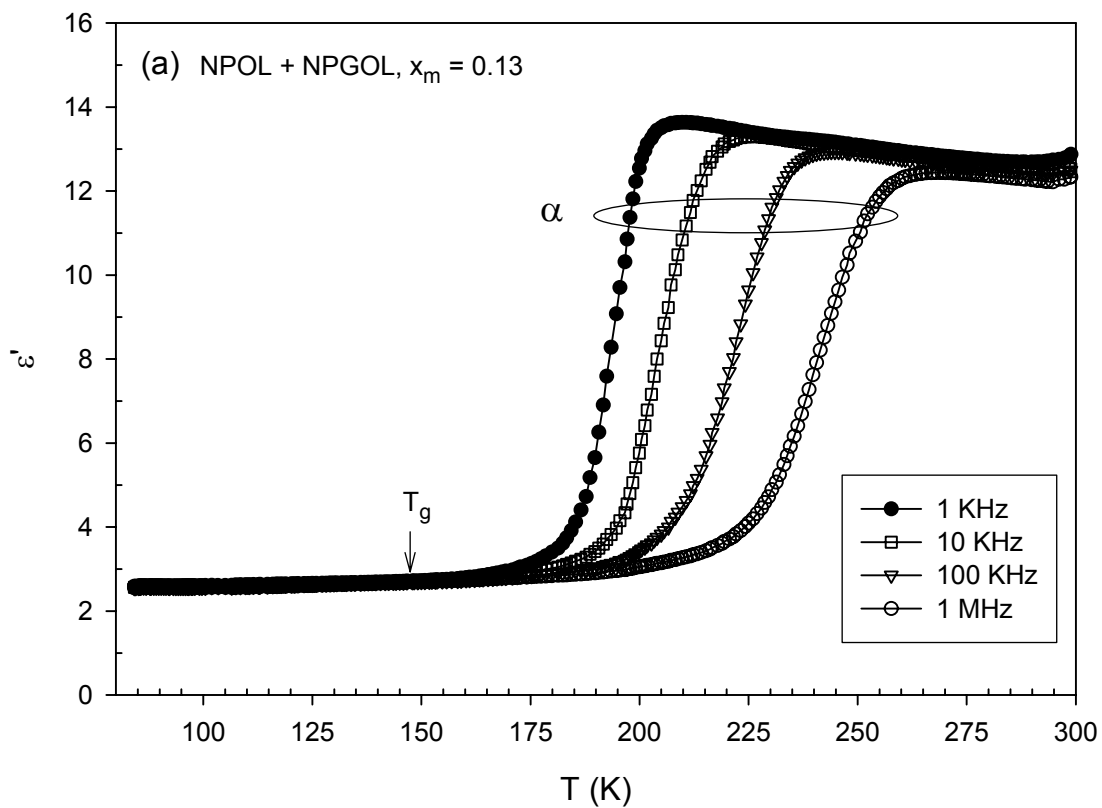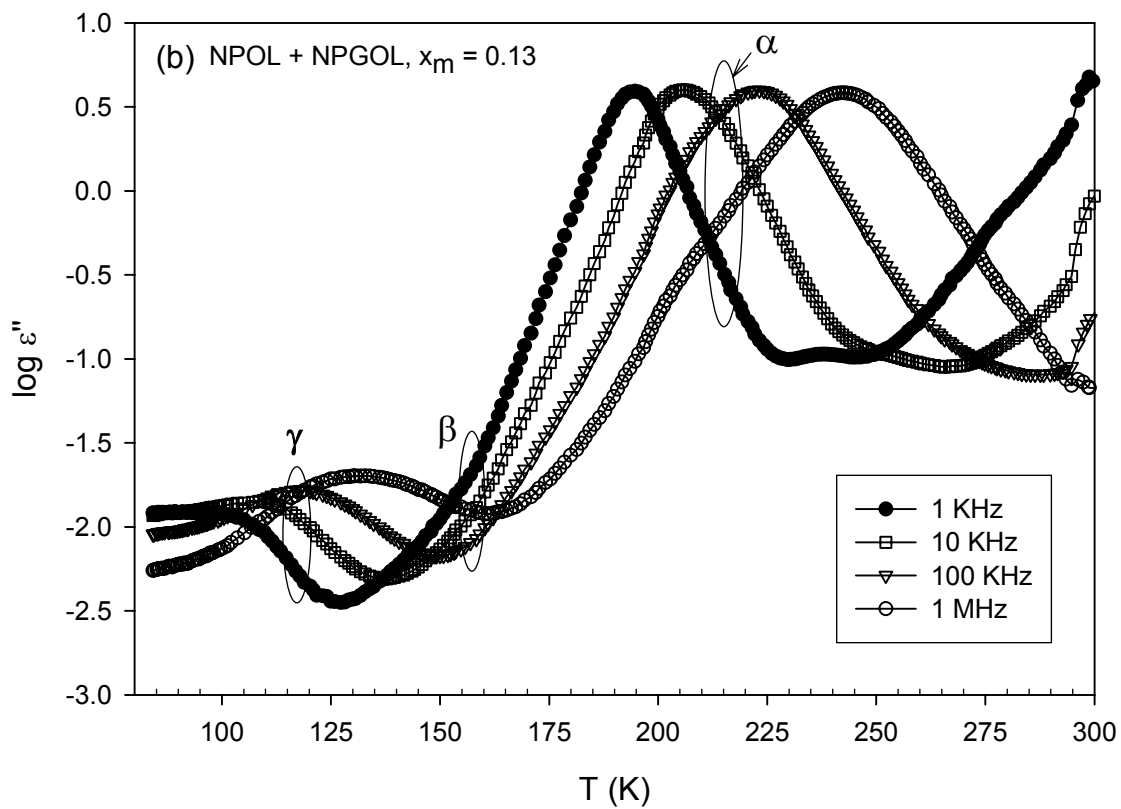



SIF<sub>6</sub>

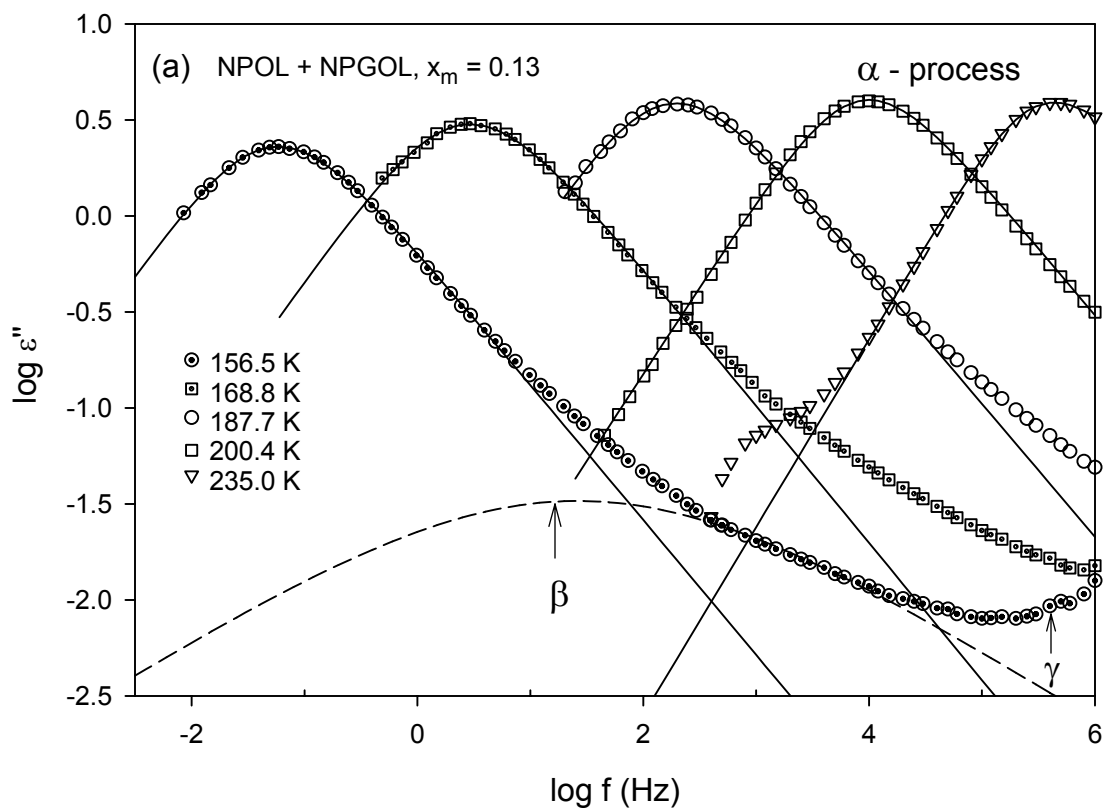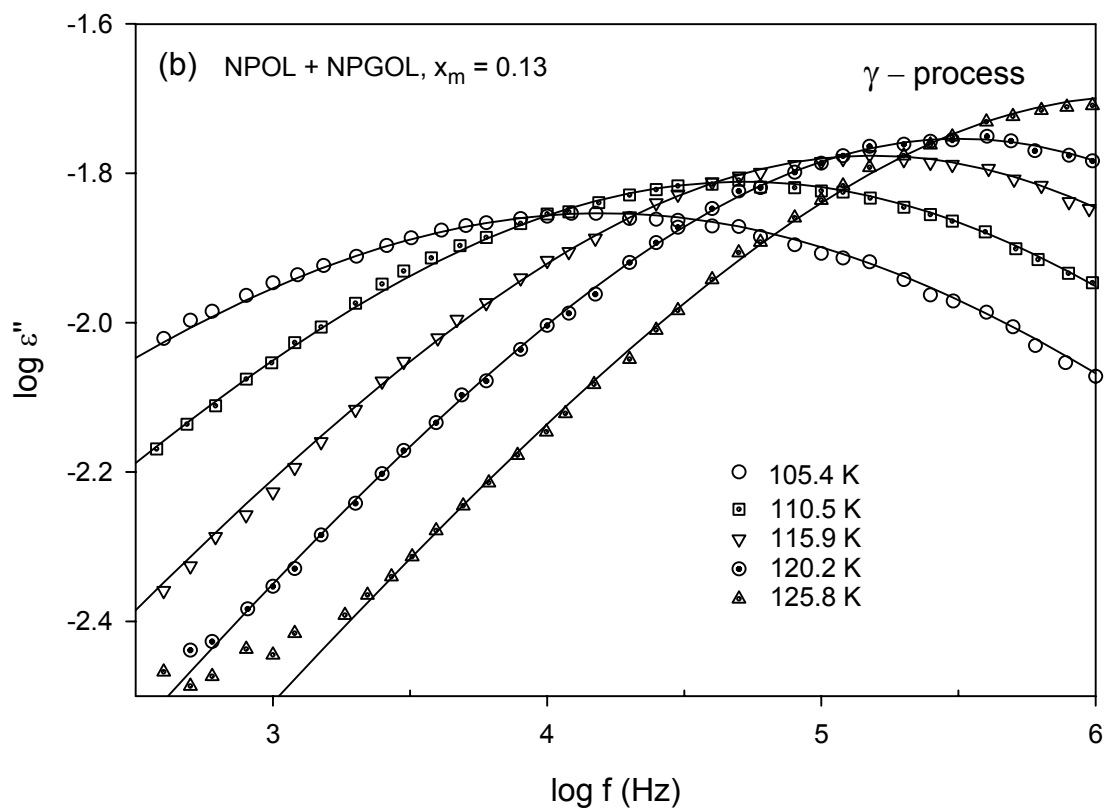

SIF<sub>7</sub>

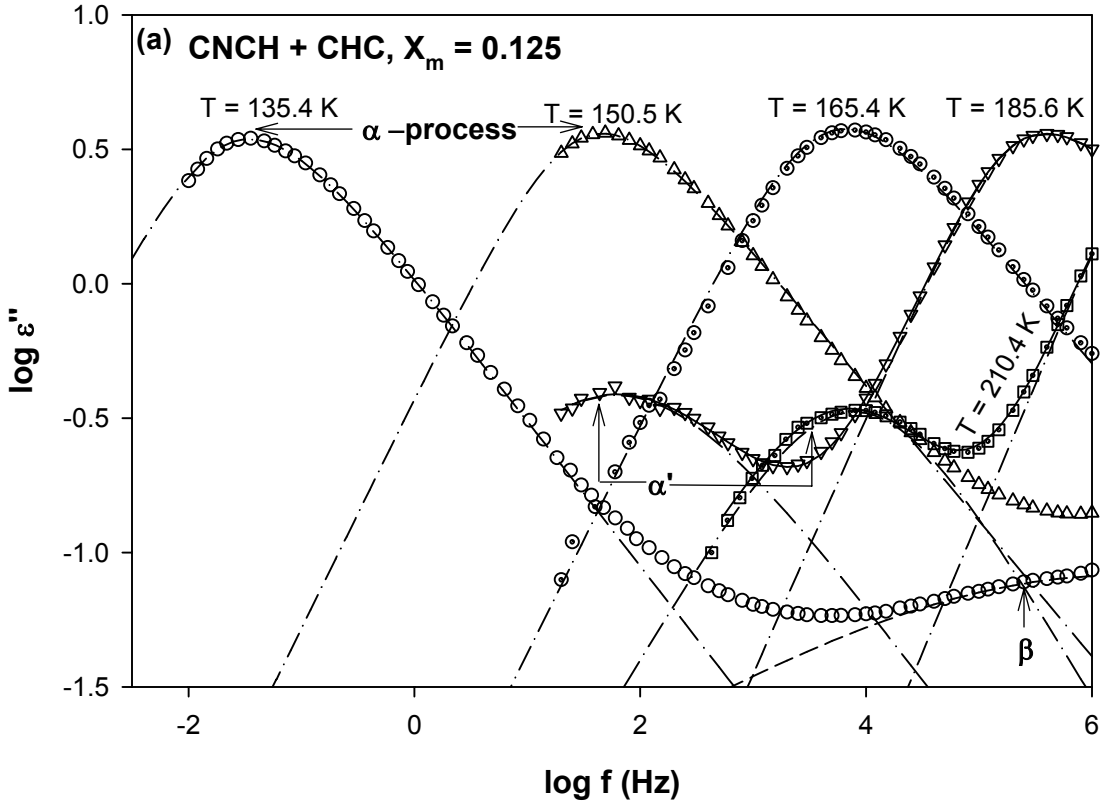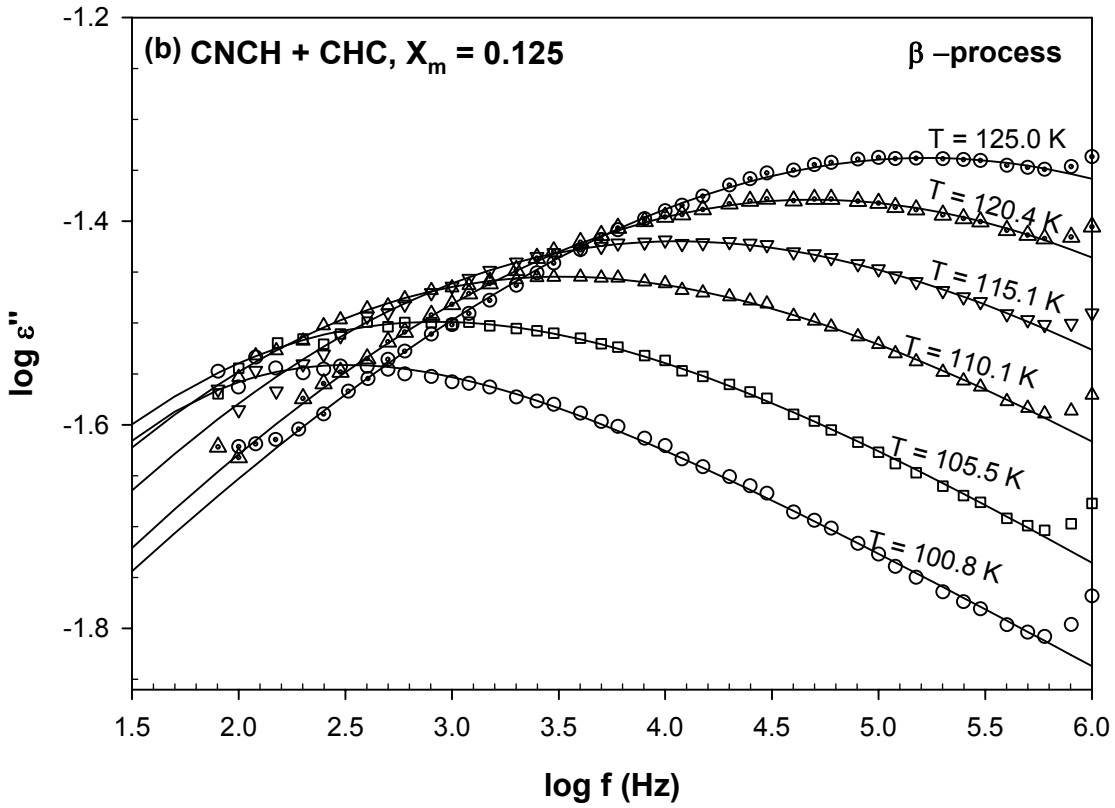

## Supplementary Figure Captions

SIF<sub>1</sub>. CHXOL + CHPOL binary system: Variation of  $\log \varepsilon''$  with temperature at a test frequency of 1 kHz, for different concentrations of CHPOL. Note that the presence of a smaller process designated as  $\beta$ - process along with the  $\alpha$ - and  $\gamma$ - processes. It may be noted that the  $\alpha'$ -process present<sup>38</sup> in pure CHXOL is not resolvable in this binary system.

SIF<sub>2</sub>. Double logarithmic plot of  $\varepsilon''$  vs. frequency at different temperatures for various relaxation processes of CHXOL + CHPOL binary system with  $x_m = 0.25$ . (a)  $\alpha$  -, &  $\beta$ - process (b)  $\gamma$ -process. The solid line corresponds to the HN- equation (2) for the  $\alpha$ - process, dashed line corresponds to the CC-fit for the resolved  $\beta$ -process in panel (a) and solid line corresponds to the CC-fit for  $\beta$ -process in panel (b). The rise in the loss at frequencies above 10 kHz in (a) is due to the  $\beta$ -process. The parameters of eq. 2 for the  $\alpha$  - &  $\gamma$ -processes are given in supplementary Table (SIT<sub>1</sub>).

SIF<sub>3</sub>. Variation of various physical parameters of CHXOL + CHPOL binary system with mole fraction ( $x_m$ ) of second component i .e. CHPOL: (a)  $T_g(D)$ , [where  $T_g(D)$  is the temperature at which the  $f_m$  value is  $10^{-3}$  Hz]; (b)  $\log f_m$  & (c) dielectric strength ( $\Delta\varepsilon$ ) at three fixed temperatures. The thick lines are fits to eq. 5.

SIF<sub>4</sub> . NPOL + NPGOL binary system: Variation of  $\log \varepsilon''$  with temperature at a test frequency of 1 kHz, for different concentrations of NPGOL. Note that the presence of a smaller process designated as  $\beta$ - process along with the  $\alpha$ - and  $\gamma$ - processes.

SIF<sub>5</sub>. Behavior of NPOL + NPGOL binary system for  $x_m = 0.13$ . Temperature variation of the (a) real and (b) imaginary parts of the complex permittivity at various test frequencies. The phase designated as S<sub>1</sub> is the solid solution.

SIF<sub>6</sub>. Double logarithmic plot of  $\varepsilon''$  vs. frequency at different temperatures for various relaxation processes of NPOL + NPGOL binary system with  $x_m = 0.13$ . (a)  $\alpha$ -, &  $\beta$ -process (b)  $\gamma$ -process. The solid line corresponds to the HN- equation (2) for the  $\alpha$ -process, dashed line corresponds to the CC-fit for the resolved  $\beta$ -process in panel (a) and solid line corresponds to the CC-fit for  $\gamma$ -process in panel (b). The rise in the loss at frequencies above 10 kHz in (a) is due to the  $\gamma$ -process. The parameters of eq. 2 for the  $\alpha$ - &  $\gamma$ -processes are given in SIT<sub>2</sub>.

SIF<sub>7</sub>. Double logarithmic plot of  $\varepsilon''$  vs. frequency of CNCH + CHC binary system for different temperatures with  $x_m = 0.125$ : (a)  $\alpha$ - process and (b)  $\beta$ - process. The dashed dotted line in panel (a) and solid line in panel (b) corresponds to the HN-parameters shown in SIT<sub>3</sub>. For  $T = 185.6$  K, the solid line represents the typical ansatz (HN + CC) fit to resolve the  $\alpha'$ - and  $\alpha$ - processes.
